# Supplementary material for: Characteristics and Secondary Organic Aerosol Formation of Volatile Organic Compounds from Vehicle and Cooking Emissions
Source: MDPI journal article supplement (doi:10.3390/atmos14050806), 2023-04-28
Supplement: s1 [file s1]

## Supplementary Materials:

# Characteristics and Secondary Organic Aerosol Formation of Volatile Organic Compounds from Vehicle and Cooking Emissions

Rui Tan <sup>1</sup>, Song Guo <sup>1,2,\*</sup>, Sihua Lu <sup>1</sup>, Hui Wang <sup>3</sup>, Wenfei Zhu <sup>4</sup>, Ying Yu <sup>1,2</sup>, Rongzhi Tang <sup>1</sup>, Ruizhe Shen <sup>1</sup>, Kai Song <sup>1</sup>, Daqi Lv <sup>1</sup>, Wenbin Zhang <sup>5</sup>, Zhou Zhang <sup>5</sup>, Shijin Shuai <sup>5</sup>, Shuangde Li <sup>6</sup>, Yunfa Chen <sup>6</sup> and Yan Ding <sup>7,\*</sup>

- <sup>1</sup> State Key Joint Laboratory of Environmental Simulation and Pollution Control, International Joint Laboratory for Regional Pollution Control, Ministry of Education (IJRC), College of Environmental Sciences and Engineering, Peking University, Beijing 100871, China; 2001111891@pku.edu.cn (R.T.); lshua@pku.edu.cn (S.L.); ying.yu@pku.edu.cn (Y.Y.); rongzhi.tang@cityu.edu.hk (R.T.); ruizhe\_shen@pku.edu.cn (R.S.); 1901111786@pku.edu.cn (K.S.); dqlv@pku.edu.cn (D.L.)
  - <sup>2</sup> Collaborative Innovation Center of Atmospheric Environment and Equipment Technology, Nanjing University of Information Science & Technology, Nanjing 210044, China
  - <sup>3</sup> Institute of Energy and Climate Research, Troposphere (IEK-8), Forschungszentrum Jülich GmbH, 52428 Jülich, Germany
  - <sup>4</sup> School of Energy and Power Engineering, University of Shanghai for Science and Technology, Shanghai 200093, China
  - <sup>5</sup> State Key Laboratory of Automotive Safety and Energy, Tsinghua University, Beijing 100871, China; sjshuai@tsinghua.edu.cn (S.S.)
  - <sup>6</sup> State Key Laboratory of Multiphase Complex Systems, Institute of Process Engineering, Chinese Academy of Sciences, Beijing 100190, China; sdli@ipe.ac.cn (S.L.)
  - <sup>7</sup> State Environmental Protection Key Laboratory of Vehicle Emission Control and Simulation, Chinese Research Academy of Environmental Sciences, Beijing 100012, China
- \* Correspondence: songguo@pku.edu.cn (S.G.); dingyan@craes.org.cn (Y.D.)

**Table S1.** Parameters of the engine used in this study.

| Parameter         | Reference Value      |
|-------------------|----------------------|
| Stroke            | 78.6mm               |
| Cylinder Number   | 3                    |
| Cylinder Diameter | 73.4mm               |
| Compression Ratio | 9.6:1                |
| Maximum Power     | 100kW 6000rpm        |
| Peak Torque       | 205 N m 2000~3000rpm |

**Table S2.** Materials of each dishes.

|                              | Bean      | Vegetable    | Meat         |
|------------------------------|-----------|--------------|--------------|
| Materials                    | 500g Tofu | 300g cabbage | 170g chicken |
| Corn Oil                     | 200mL     | 40mL         | 500mL        |
| Cooking Time                 | 11mins    | 8mins        | 10mins       |
| Oil Temperature <sup>a</sup> | 106°C     | 101°C        | 149°C        |

<sup>a</sup> Temperature here referred to the initial temperature when materials were added.

**Table S3.** VOCs species measured in this study and their calibration correlation coefficients.

| Alkanes                 | R <sup>2</sup> | Alkenes         | R <sup>2</sup> | Aromatics               | R <sup>2</sup> | Halocarbons                 | R <sup>2</sup> | OVOCs              | R <sup>2</sup> |
|-------------------------|----------------|-----------------|----------------|-------------------------|----------------|-----------------------------|----------------|--------------------|----------------|
| Ethane                  | 0.9998         | Ethylene        | 0.9996         | Benzene                 | 0.9999         | Chloro-methane              | 0.9973         | Acetaldehyde       | 0.9634         |
| Propane                 | 0.9987         | Propylene       | 0.9997         | Toluene                 | 0.9999         | Bromo-methane               | 0.9984         | Acrolein           | 0.9999         |
| iso-Butane              | 0.9997         | trans-2-Butene  | 0.9989         | Ethylbenzene            | 0.9992         | Freon-11                    | 0.9990         | Propanal           | 0.9992         |
| n-Butane                | 0.9999         | 1-Butene        | 0.9995         | m/p-Xylene              | 0.9984         | CarbonTetra-chloride        | 0.9933         | Acetone            | 0.9995         |
| Cyclopentane            | 0.9999         | cis-2-Butene    | 0.9995         | o-Xylene                | 0.9995         | Bromodi-chloro-methane      | 0.9998         | Methacrolein       | 0.9992         |
| iso-Pentane             | 0.9998         | 1,3-Butadiene   | 0.9983         | Styrene                 | 0.9991         | Freon-114                   | 0.9999         | n-Butanal          | 1.0000         |
| n-Pentane               | 0.9997         | 1-Pentene       | 0.9989         | Iso-propylbenzene       | 0.9997         | Vinylchloride               | 1.0000         | MethylVinyl-Ketone | 0.9980         |
| 2,2-Dimethylbutane      | 0.9999         | trans-2-Pentene | 0.9992         | n-Propylbenzene         | 0.9987         | Chloro-ethane               | 0.9988         | MethylEthyl-Ketone | 0.9983         |
| 2,3-Dimethylbutane      | 0.9999         | cis-2-Pentene   | 0.9998         | m-Ethyltoluene          | 0.9984         | 1,1-Dichloro-ethene         | 0.9981         | 2-Pentanone        | 0.9714         |
| 2-Methylpentane         | 0.9995         | Isoprene        | 0.9992         | p-Ethyltoluene          | 0.9978         | Freon-113                   | 0.9979         | Pentanal           | 0.9972         |
| 3-Methylpentane         | 0.9999         | 1-Hexene        | 0.9999         | 1,3,5-Trime-thylbenzene | 0.9985         | 1,1-Dichloro-ethane         | 0.9977         | 3-Pentanone        | 0.9857         |
| n-Hexane                | 0.9998         |                 |                | o-Ethyltoluene          | 0.9989         | cis-1,2-Di-chloroethene     | 0.9998         | Hexanal            | 0.9708         |
| Methylcyclopentane      | 0.9998         |                 |                | 1,2,4-Trime-thylbenzene | 0.9977         | 1,1,1-Trichlo-roethane      | 0.9998         |                    |                |
| Cyclohexane             | 1.0000         |                 |                | 1,2,3-Trime-thylbenzene | 0.9964         | Trichloroeth-ylene          | 0.9999         |                    |                |
| 2,4-Dimethylpentane     | 0.9997         |                 |                | m-Dieth-ylbenzene       | 0.9892         | 1,1,2-Trichlo-roethane      | 0.9999         |                    |                |
| 2-Methylhexane          | 0.9999         |                 |                | p-Dieth-ylbenzene       | 0.9849         | 1,2-Dibromo-ethane          | 0.9999         |                    |                |
| 2,3-Dimethylpentane     | 0.9998         |                 |                |                         |                | 1,2-Dichloro-propane        | 0.9999         |                    |                |
| 3-Methylhexane          | 0.9998         |                 |                |                         |                | trans-1,3-Di-chloropro-pene | 1.0000         |                    |                |
| n-Heptane               | 0.9999         |                 |                |                         |                | cis-1,3-Di-chloropro-pene   | 1.0000         |                    |                |
| Methylcyclohexane       | 0.9999         |                 |                |                         |                | Chloroben-zene              | 0.9997         |                    |                |
| 2,2,4-Trime-thylpentane | 0.9998         |                 |                |                         |                | 1,3-Dichloro-benzene        | 1.0000         |                    |                |

---

|                             |        |                          |        |
|-----------------------------|--------|--------------------------|--------|
| 2,3,4-Trime-<br>thylpentane | 0.9998 | 1,4-Dichloro-<br>benzene | 0.9999 |
| 2-<br>Methylhep-<br>tane    | 0.9997 | 1,2-Dichloro-<br>benzene | 0.9998 |
| 3-<br>Methylhep-<br>tane    | 0.9996 | BenzylChlo-<br>ride      | 0.9997 |
| n-Octane                    | 0.9995 |                          |        |
| Nonane                      | 0.9992 |                          |        |
| n-Decane                    | 0.9980 |                          |        |
| n-Undecane                  | 0.9001 |                          |        |
| n-Dodecane                  | 1.0000 |                          |        |

---

**Table S4.** MIR values of the VOCs used in this study.

| Species                | MIR(g/gVOCs) | Species                   | MIR(g/gVOCs) |
|------------------------|--------------|---------------------------|--------------|
| Alkanes                |              | Aromatics                 |              |
| Ethane                 | 0.28         | Isopropylbenzene          | 2.52         |
| Propane                | 0.49         | n-Propylbenzene           | 2.03         |
| iso-Butane             | 1.23         | m-Ethyltoluene            | 7.39         |
| n-Butane               | 1.15         | p-Ethyltoluene            | 4.44         |
| Cyclopentane           | 2.39         | 1,3,5-Trimethylbenzene    | 0.00         |
| iso-Pentane            | 1.45         | o-Ethyltoluene            | 5.59         |
| n-Pentane              | 1.31         | 1,2,4-Trimethylbenzene    | 8.87         |
| 2,2-Dimethylbutane     | 1.17         | 1,2,3-Trimethylbenzene    | 11.97        |
| 2,3-Dimethylbutane     | 0.97         | m-Diethylbenzene          | 7.10         |
| 2-Methylpentane        | 1.50         | p-Diethylbenzene          | 4.43         |
| 3-Methylpentane        | 1.80         | Halocarbons               |              |
| n-Hexane               | 1.24         | Chloromethane             | 0.04         |
| Methylcyclopentane     | 2.19         | Bromomethane              | 0.02         |
| Cyclohexane            | 1.25         | Freon-11                  | 0.00         |
| 2,4-Dimethylpentane    | 1.55         | CarbonTetrachloride       | 0.00         |
| 2-Methylhexane         | 1.19         | Bromodichloromethane      | 9.65         |
| 2,3-Dimethylpentane    | 1.34         | Freon-114                 | 0.00         |
| 3-Methylhexane         | 1.61         | Vinylchloride             | 2.83         |
| n-Heptane              | 1.07         | Chloroethane              | 0.29         |
| Methylcyclohexane      | 1.70         | 1,1-Dichloroethene        | 1.79         |
| 2,2,4-Trimethylpentane | 1.26         | Freon-113                 | 0.00         |
| 2,3,4-Trimethylpentane | 1.03         | 1,1-Dichloroethane        | 0.07         |
| 2-Methylheptane        | 1.07         | cis-1,2-Dichloroethene    | 1.70         |
| 3-Methylheptane        | 5.08         | 1,1,1-Trichloroethane     | 0.00         |
| n-Octane               | 0.00         | Trichloroethylene         | 0.64         |
| Nonane                 | 0.78         | 1,1,2-Trichloroethane     | 0.09         |
| n-Decane               | 0.68         | 1,2-Dibromoethane         | 0.00         |
| n-Undecane             | 0.61         | 1,2-Dichloropropane       | 0.29         |
| n-Dodecane             | 0.00         | trans-1,3-Dichloropropene | 5.03         |
| Alkenes                |              | cis-1,3-Dichloropropene   | 3.70         |
| Ethylene               | 9.00         | Chlorobenzene             | 1.79         |
| Propylene              | 11.66        | 1,3-Dichlorobenzene       | 0.18         |
| trans-2-Butene         | 15.16        | 1,4-Dichlorobenzene       | 0.18         |
| 1-Butene               | 9.73         | 1,2-Dichlorobenzene       | 0.18         |
| cis-2-Butene           | 14.24        | BenzylChloride            | 0.00         |
| 1,3-Butadiene          | 12.61        | OVOCs                     |              |
| 1-Pentene              | 7.21         | Acetaldehyde              | 6.54         |
| trans-2-Pentene        | 10.56        | Acrolein                  | 7.45         |
| cis-2-Pentene          | 10.38        | Propanal                  | 7.08         |
| Isoprene               | 10.61        | Acetone                   | 0.36         |
| 1-Hexene               | 5.49         | Methacrolein              | 6.01         |
| Aromatics              |              | n-Butanal                 | 5.97         |
| Benzene                | 0.72         | MethylVinylKetone         | 9.65         |
| Toluene                | 4.00         | MethylEthylKetone         | 1.48         |
| Ethylbenzene           | 0.00         | 2-Pentanone               | 2.81         |
| m/p-Xylene             | 7.80         | Pentanal                  | 6.01         |
| o-Xylene               | 7.64         | 3-Pentanone               | 1.24         |

---

|         |      |         |      |
|---------|------|---------|------|
| Styrene | 0.02 | Hexanal | 4.35 |
|---------|------|---------|------|

---

Table S5. SOA yield used in this study.

| Species                | Yield (g/g VOC) | Species                | Yield (g SOA/g VOC) |
|------------------------|-----------------|------------------------|---------------------|
| Alkanes                |                 | Aromatics              |                     |
| Methylcyclopentane     | 0.046           | Benzene                | 0.196               |
| Cyclohexane            | 0.046           | Toluene                | 0.944               |
| Methylcyclohexane      | 0.14            | Ethylbenzene           | 0.063               |
| 2,4-Dimethylpentane    | 0.01            | m/p-Xylene             | 0.063               |
| 2-Methylhexane         | 0.01            | o-Xylene               | 0.063               |
| 2,3-Dimethylpentane    | 0.01            | Styrene                | 0.063               |
| 3-Methylhexane         | 0.01            | Isopropylbenzene       | 0.063               |
| n-Heptane              | 0.01            | n-Propylbenzene        | 0.063               |
| 2,2,4-Trimethylpentane | 0.048           | m-Ethyltoluene         | 0.063               |
| 2,3,4-Trimethylpentane | 0.048           | p-Ethyltoluene         | 0.063               |
| 2-Methylheptane        | 0.048           | 1,3,5-Trimethylbenzene | 0.063               |
| 3-Methylheptane        | 0.048           | o-Ethyltoluene         | 0.063               |
| n-Octane               | 0.048           | 1,2,4-Trimethylbenzene | 0.063               |
| Nonane                 | 0.093           | 1,2,3-Trimethylbenzene | 0.063               |
| n-Decane               | 0.169           | m-Diethylbenzene       | 0.063               |
| n-Undecane             | 0.313           | p-Diethylbenzene       | 0.063               |
| OVOCs                  |                 |                        |                     |
| MethylEthylKetone      | 0.008           |                        |                     |
| n-Pentanal             | 0.093           |                        |                     |
| n-Hexanal              | 0.093           |                        |                     |

Table S6. Top ten species in cooking emission and vehicle emission.

| Cooking Emission |               |              |                 |                        |               |
|------------------|---------------|--------------|-----------------|------------------------|---------------|
| Bean             |               | Vegetable    |                 | Meat                   |               |
| Species          | Mass Fraction | Species      | Mass Fraction   | Species                | Mass Fraction |
| Hexanal          | 16% ± 2%      | Hexanal      | 14% ± 6%        | Hexanal                | 30% ± 3%      |
| iso-Butane       | 13% ± 2%      | Acetone      | 10% ± 3%        | Acetone                | 15% ± 10%     |
| Ethane           | 10% ± 4%      | iso-Butane   | 9% ± 8%         | Pentanal               | 7% ± 1%       |
| Ethylene         | 7% ± 8%       | Ethane       | 8% ± 3%         | iso-Butane             | 7% ± 6%       |
| Propylene        | 6% ± 2%       | Acetaldehyde | 7% ± 5%         | Acrolein               | 6% ± 2%       |
| iso-Pentane      | 6% ± 10%      | Styrene      | 5% ± 2%         | Propylene              | 5% ± 4%       |
| Acetaldehyde     | 3% ± 2%       | Pentanal     | 5% ± 0%         | n-Butanal              | 5% ± 1%       |
| m/p-Xylene       | 3% ± 1%       | n-Butanal    | 4% ± 2%         | Propanal               | 3% ± 1%       |
| Acetone          | 3% ± 3%       | m/p-Xylene   | 4% ± 1%         | n-Butane               | 2% ± 2%       |
| Pentanal         | 2% ± 1%       | Acrolein     | 3% ± 1%         | 1,2,4-Trimethylbenzene | 2% ± 1%       |
| Vehicle Emission |               |              |                 |                        |               |
| Gasoline         |               |              | E10             |                        |               |
| Species          | Mass Fraction |              | Species         | Mass Fraction          |               |
| iso-Pentane      | 20% ± 3%      |              | iso-Pentane     | 24% ± 6%               |               |
| Ethane           | 8% ± 1%       |              | n-Butane        | 11% ± 3%               |               |
| Ethylene         | 6% ± 1%       |              | Ethane          | 8% ± 4%                |               |
| Toluene          | 5% ± 1%       |              | iso-Butane      | 7% ± 2%                |               |
| n-Pentane        | 5% ± 1%       |              | n-Pentane       | 6% ± 1%                |               |
| 2-Methylpentane  | 4% ± 1%       |              | Propane         | 5% ± 4%                |               |
| Benzene          | 4% ± 1%       |              | 2-Methylpentane | 3% ± 1%                |               |

|                |             |                    |             |
|----------------|-------------|--------------------|-------------|
| 3-Methylhexane | 3% $\pm$ 1% | 3-Methylpentane    | 2% $\pm$ 1% |
| 2-Methylhexane | 3% $\pm$ 1% | n-Hexane           | 1% $\pm$ 0% |
| n-Butane       | 3% $\pm$ 1% | Methylcyclopentane | 1% $\pm$ 1% |

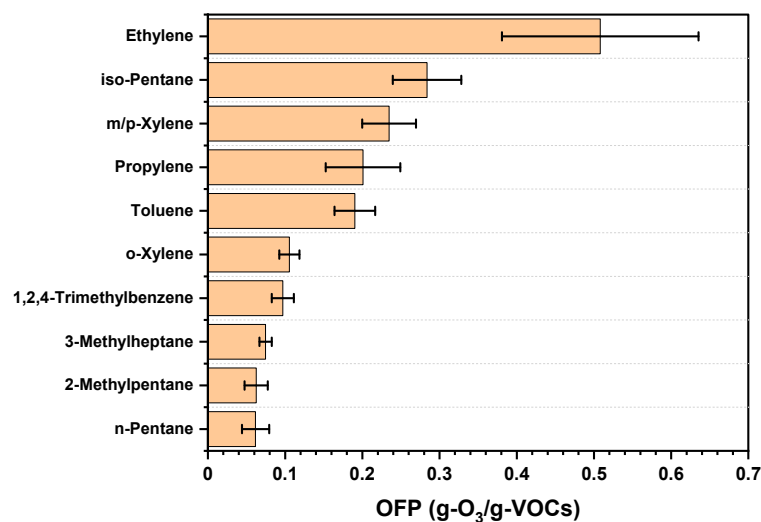

Figure S1. Top ten species contributing to OFP from Gasoline emissions.

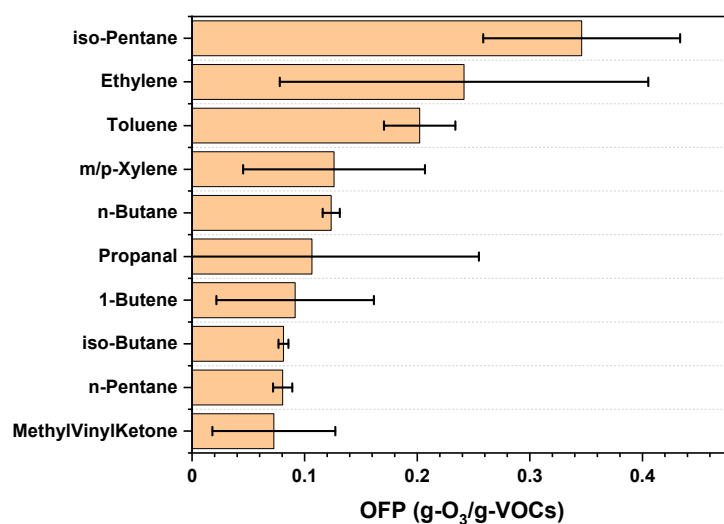

Figure S2. Top ten species contributing to OFP from E10 emissions.

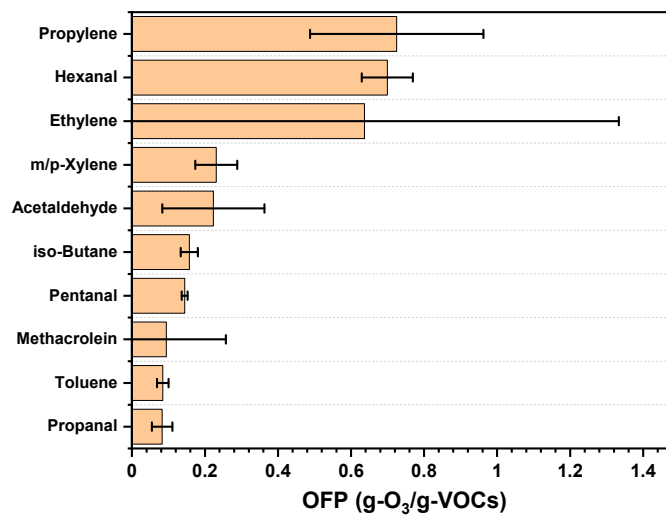

Figure S3. Top ten species contributing to OFP from Bean emissions.

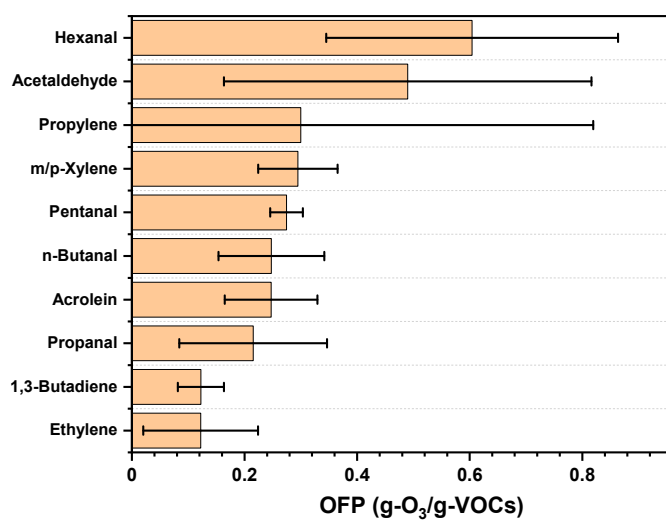

Figure S4. Top ten species contributing to OFP from Vegetable emissions.



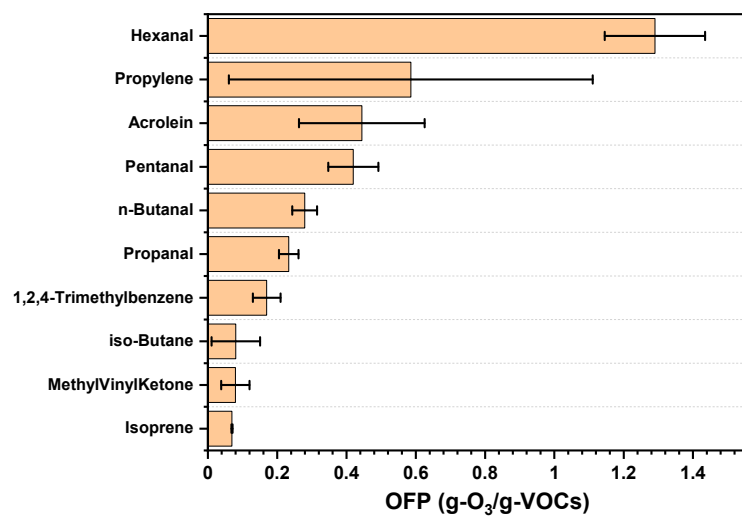

**Figure S5.** Top ten species contributing to OFP from Meat emissions.
